CORRECTION

# Correction: Root colonization and growth promotion of soybean, wheat and Chinese cabbage by *Bacillus cereus* YL6

Yongli Ku, Guoyi Xu, Xiaohong Tian, Huiqin Xie, Xiangna Yang, Cuiling Cao, Yinglong Chen

Dr. Yinglong Chen is not included in the author byline. He should be listed as the seventh author and affiliated with State Key Laboratory of Soil Erosion and Dryland Farming on the Loess Plateau, Northwest A&F University, Chinese Academy of Sciences, Yangling, Shaanxi 712100, China, and the UWA Institute of Agriculture, & School of Agriculture and Environment, The University of Western Australia, LB 5005, Perth 6001, Australia. The contributions of this author are as follows: Contributed resources, supervision, and validation.

There are errors in the Funding section. The correct funding information is as follows: This work was supported by National Natural Science Foundation of China (31471946) and Chinese Academy of Sciences ("100 Talent" Program, A315021449).

## Reference

1. Ku Y, Xu G, Tian X, Xie H, Yang X, Cao C (2018) Root colonization and growth promotion of soybean, wheat and Chinese cabbage by *Bacillus cereus* YL6. PLoS ONE 13(11): e0200181. <https://doi.org/10.1371/journal.pone.0200181> PMID: 30462642

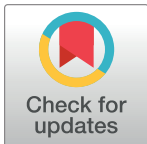

## OPEN ACCESS

**Citation:** Ku Y, Xu G, Tian X, Xie H, Yang X, Cao C, et al. (2018) Correction: Root colonization and growth promotion of soybean, wheat and Chinese cabbage by *Bacillus cereus* YL6. PLoS ONE 13(12): e0210035. <https://doi.org/10.1371/journal.pone.0210035>

**Published:** December 27, 2018

**Copyright:** © 2018 Ku et al. This is an open access article distributed under the terms of the [Creative Commons Attribution License](https://creativecommons.org/licenses/by/4.0/), which permits unrestricted use, distribution, and reproduction in any medium, provided the original author and source are credited.
